# Supplementary material for: The role of 18F-FDG PET/CT in patients with serous cavity effusion of undetermined origin: a retrospective clinical study
Source: PeerJ. 2025 May 22;13:e19495. doi: 10.7717/peerj.19495 (PMC12103840; doi:10.7717/peerj.19495)
Supplement: Supplemental Information 1 [file peerj-13-19495-s001.xlsx]

## Sheet: Sheet1
Gender	years	location	primary lesion/SUVmax	SUVmax	SUVmean	SUVL	SUVM	SUVLe	Ca125	Ca199	ferritin	CEA	pathological diagnosis
F	60	PCE/PLE	N	9.6	5.8	2.1	1.7	-	-	-	-	-	nonspecific inflammation/-
M	51	PCE	liver/7.2	0.8	0.6	2.6	2.3	-	-	-	-	-	liver Ca/-
F	65	PCE/PLE	N	3.5/1.4	1.9/1.2	1.8	1.6	-	-	-	-	-	nonspecific inflammation/-
M	62	PCE	lung/0.6	1	0.6	3	2.7	-	N	N	N	N	Proliferative foci/-
F	52	PCE	heart/N	1.9	1.4	2.6	2.4	-	209.1	-	-	-	DCM dilated cardiomyopathy/-
F	44	PCE	mediastinum/4.5	1.8	1.5	2.6	2.3	-	N	N	-	NSE-	Fibrinous mediastinitis
M	76	PCE	lymphoma/14.0	1.7	1.4	3.7	3.3	-	70.6	36.5	-	-	lymphoma
M	81	PCE/PLE	pericardium/9.8	3.4/2.6	1.4/1.7	3.1	2.6	-	277.6	-	-	875.9	nonspecific inflammation/-
M	78	PCE/PLE	mediastinum/17.4	1.7/12.9	1.4/5.0	2.5	2.1	-	307.5	-	-	-	lung cancer/+
F	71	PCE/PLE	lung/3.5	1.4/1.4	1.2/0.9	2.3	1.9	-	-	-	-	>1500	pneumonia/-
M	77	PCE/PLE	thyroid/22.8	2.8/1.5	2.5/0.9	3.6	3.1	-	N	N	N	N	hypothyroidism
M	57	PCE/PLE	-	0.7	0.6	1.6	1.4	-	N	N	N	N	heart failure/-
M	40	PCE/PLE	lung/2.1	1.0/1.2	0.7/1.0	2.1	1.8	-	260.4	-	-	-	heart failure/-
M	74	PCE/PLE	lung/9.5	2.3/1.9	1.5/1.5	2.2	2	6.8/3.1	2373	1895	110.33	-	lung cancer/+
F	52	PCE/PLE	pericardium/11.0	2.4/1.5	1.1/1.1	1.8	1.5	6.7/4.3	214.9	-	-	261.2	tuberculous pericarditis
M	72	PCE/PLE/ASE	-	0.9	0.7	2.6	2.3	-	-	-	-	433.6	hypoproteinemia
F	57	PCE	-	1.3	0.6	2.5	2.3	-	-	-	-	-	hypertensive heart disease
M	34	PCE/PLE	mediastinum/5.7	1.6/1.7	1.3/1.5	2.4	2.1	-	181	-	-	-	Thymoma type A
M	74	PCE	pericardium/10.7	2.9	2.5	2.3	1.9	-	4	-	-	-	mesothelioma
F	51	PCE/PLE	pericardium/19.9	3.4	2.1	1.7	1.4	-	1350.2	-	-	-	mesothelioma
F	72	PCE/PLE	adnexa/2.1	5.6/1.2	3.0/0.7	2.7	2.2	-	245	-	-	-	Fibroma of follicular membrane
F	60	PCE/PLE	N	9.6	5.8	2.1	1.7						nonspecific inflammation/-
F	65	PCE/PLE	N	3.5/1.4	1.9/1.2	1.8	1.6			-	-	-	nonspecific inflammation/-
M	81	PCE/PLE	pericardium/9.8	3.4/2.6	1.4/1.7	3.1	2.6	-	277.6	-	-	875.9	nonspecific inflammation/-
M	78	PCE/PLE	mediastinum/17.4	1.7/12.9	1.4/5.0	2.5	2.1		307.5	-	-	-	lung cancer/+
F	71	PCE/PLE	lung/2.1	1.4/1.4	1.2/0.9	2.3	1.9	-	-	-	-	>1500	pneumonia/-
M	77	PCE/PLE	thyroid/22.8	2.8/1.5	2.5/0.9	3.6	3.1	-	N	N	N	N	hypothyroidism
M	57	PCE/PLE	-	0.7	0.6	1.6	1.4	-	N	N	N	N	heart failure/-
M	40	PCE/PLE	lung/2.1	1.0/1.2	0.7/1.0	2.1	1.8	-	260.4	-	-	-	heart failure/-
M	74	PCE/PLE	lung/9.5	2.3/1.9	1.5/1.5	2.2	2	6.8/3.1	2373	1895	110.33	-	lung cancer/+
F	52	PCE/PLE	pericardium/11.0	2.4/1.5	1.1/1.1	1.8	1.5	6.7/4.3	214.9	-	-	261.2	tuberculous pericarditis
M	72	PCE/PLE/ASE	-	0.9	0.7	2.6	2.3	-	-	-	-	433.6	tuberculous pericarditis
M	34	PCE/PLE	mediastinum/5.7	1.6/1.7	1.3/1.5	2.4	2.1	-	181	-	-	-	Thymoma type A
F	51	PCE/PLE	pericardium/19.9	3.4	2.1	1.7	1.4	-	1350.2	-	-	-	mesothelioma
F	72	PCE/PLE	adnexa/2.1	5.6/1.2	3.0/0.7	2.7	2.2	-	245	-	-	-	Fibroma of follicular membrane
M	58	PLE	lung/6.3	4	2.3	3.3	2.9		N	N	N	N	lung cancer/+
F	46	PLE/ASE	adnexa/15.7	2.7/3.4	1.5/2.7	2.6	2.2		3773	-	-	-	lung cancer/+
M	31	PLE	lymphoma/17.6	2.5	2.1	2	1.8	-	N	N	-	N	EBV lymphoma/+
M	43	PLE	lung/9.8	2.6	1.8	2.2	1.9	-	100.6	-	-	-	lung cancer/+
M	44	PLE/ASE	lung/0.8	1.1/1.2	1.0/1.0	1.6	1.4	8.1/5.5	657.4	-	-	485	tuberculous peritonitis
F	73	PLE	lung/2.6	2.1	1.8	3.1	2.6	4.0/2.7	-	-	-	-	lung cancer/+
M	50	PLE	lung/19.4	2.8	2.5	2	1.8	-	N	N	N	N	lung cancer/+
F	77	PLE/ASE	adnexa/2.1	4.5/1.3	3.3/1.1	2	1.6						ovarian cancer/+
M	82	PLE	lung/11.1	4.6	2.8	2.5	2.1	7.4/5.1	N	N	-	N	lung cancer/+
F	78	PLE	kung/6.1	4.5	1.8	2	1.7	-	N	N	N	N	pneumoconiosis/-
M	66	PLE	lymphoma/24.8	1.9	1	1.1	1	N	-	-	-	-	B lymphoma
F	46	PLE	mediastinum/1.8	3.1	2	2.7	2.4	5.5/3.3	-	-	-	-	thymic carcinoma
M	68	PLE	lung/12.5	1	0.7	2.1	1.7	-	N	N	-	N	NSE(69.57)机化性肺炎	organizing pneumonia
F	54	PLE/ASE	adnexa/-	2.2/2.8	1.6/2.0	2.5	2.1	3.2/ 1.9；16.4/8.5	1147.5	-	-	-	ovarian cancer/+
M	51	PLE	lung/8.7	2.6	2.3	2.3	2		N	N	-	NSE-	organizing pneumonia
F	75	PLE	lung/13.1	2.6	2.2	3.2	2.9	-	N	N	79.13	-	lung cancer
M	78	PLE	lung/11.2	2.6	2	2.6	2.3	-	N	N	36.89	NSE-	lung cancer
F	55	PLE	lung/12.4	2.5	2.3	2.5	2.2	-	N	N	216.05	N	lung cancer
M	71	PLE	lung/19.8	2.3	2.1	2.4	2.2	-	N	N	-	N	lung cancer
M	52	PLE/ASE	lymphoma/8.7	3.2/1.8	2.6/1.5	2.4	2.2	-	1069.5	2043	1022	3832	lymphoma/+
M	78	PLE	lung/9.9	1.2	1	1.6	1.4	-	158	979.1	235.28	-	lung cancer
M	73	PLE	lung/14.4	2.8	1.9	3.1	2.8	-					lung cancer
F	66	PLE	lung/26.4	2.2	1.9	3	2.8	-	N	N	97.72	NSE-	lung cancer
M	73	PLE	prostate/3.3	2.6	2	1.8	1.6	-	144.4	-	-	846.8	prostate cancer
F	57	PLE/ASE	adnexa/7.6	1.6/2.2	1.4/1.6	2.3	2.1	5.8/4.3	126.7	435.8	-	-	ovarian cancer/+
F	43	PLE/ASE	adnexa/10.9	3.0/2.4	2.1/1.8	2.4	1.9	6.2/4.4	4361.2	-	-	-	ovarian cancer/+
F	62	PLE/ASE	mediastinum/16.3	1.1	0.9	1.2	0.9	-	N	-	-	-	B lymphoma
M	57	PLE/ASE	stomach/14.8	1.6/3.2	1.4/2.0	1.8	1.4	-	321.6	-	-	-	B lymphoma
F	64	PLE	pleura/3.2	1.9	1.7	3	2.8	-	N	N	N	N	cancer
M	55	PLE	lung/9.7	2.1	1.9	3.7	3.3	-	N	N	19.07	NSE-	lung cancer
F	71	PLE	lung/17.8	2.3	2.1	2.1	2	-	N	N	N	N	lung cancer
M	65	PLE	mediastinum/3.2	1.7	1.5	2.8	2.5	-	N	N	N	N	lymphoma
M	24	PLE	mediastinum/33.2	3	2.5	1.5	1.3	7.0/4.2	-	-	-	-	lymphoma
F	58	PLE	mediastinum/6.3	1.7	1.2	1.8	1.6	2.6/1.7	N	N	-		lymphoma
M	76	PLE	lung/2.8	1.5	1.3	2.8	2.6	-	N	N	N	N	heart failure/-
F	58	PLE	rectum/-	3.7	2	2.4	2.1	6.9/2.7	883.9	-	-	-	cancer
M	50	PLE	lung/27.9	3.4	2.3	2.3	1.9	-	N	N	N	N	lung cancer
M	66	PLE	lung/8,8	3.1	2.9	2.4	1.9	4.8/4.1	N	N	91.6	N	lung cancer
F	67	PLE	adnexa/3.0	2.5	2.1	3	2.5	4.2/4.0	5160	-	-	-	ovarian cancer
M	57	PLE	lung/1.6	1.7	1.5	2.4	2.1	-	168.3	193.6	-	>1500	pulmonary tuberculosis
M	64	PLE	lung/13.9	3.1	2.7	2.3	2	-	N	N	-	N	lung cancer
M	64	PLE	lung/7.6	2.8	2.4	2.8	2.5	5.1/3.2	N	N	N	N	lung cancer
M	51	PLE	lung/11.2	2.3	1.8	1.5	1.2	9.2/3.4	N	N	N	N	lung cancer
M	76	PLE	lung/20.2	2.2	1.8	2.7	2.2	-	N	-	N	N	lung cancer
M	71	PLE	lung/23.3	1.6	1.2	2.7	2	-	N	N	-	N	lung cancer
F	71	PLE	adnexa/3.5	1.5	1.3	2.8	2.5	-	145.2	-	-	-	theca cell tumor
M	59	PLE	lung/11.5	1.9	1.5	2.2	1.9	-	N	N	-	N	lung cancer
M	68	PLE	lung/24.0	1.9	1.5	1.8	1.4	-	N	N	N	N	lung cancer
F	58	PLE	lung/11.8	2.4	1.8	3.1	2.4	-	N	N	11.03	N	lung cancer
M	67	PLE	lung/10.5	2.3	2	3.8	3.3	5.3/4.3	-	-	-	-	lung cancer
F	45	PLE	lung/6.8	1.7	1.5	3.2	2.8	-	N	N	N	N	lung cancer
F	31	PLE	retroperitoneal/7.4	1.8	1.1	1.9	1.5	-	N	N	N	N	Small cell neuroendocrine carcinoma
M	82	PLE/ASE	Liver/-	1.4/1.1	1.2/0.9	2.7	2.2	-	36.6	34.5	-	-	liver cirrhosis
F	55	PLE/ASE	adnexa/13.2	3/2.1	2.1/1.7	3.9	3.2	8.4/4.6	2240.7	-	-	323.9	ovarian cancer
F	52	PLE/ASE	adnexa/15.4	2.1/2.0	1.8/1.7	2.4	2.1	7.8/4.5	1012	-	-	-	ovarian cancer
M	53	PLE	lung/4.7	1.2	1.1	2.2	1.8	-	N	N	N	N	pneumonia
M	42	PLE	lung/2.6	1.8	1.6	3.6	3.2	-	N	N	-	N	pneumonia
M	67	PLE	-	0.9	0.8	1.7	1.3	-	-	-	-	769.6	pneumonia
F	53	PLE	spine/20.6	1.9	1.7	3	2.7	9/4.6	N	N	N	N	lymphoma
F	64	PLE	lung/-	3.5	1.8	2.1	1.7	8.7/6.0	N	N	N	N	lung cancer
F	78	PLE	lung/15.7	2.2	1.8	3.3	2.8	-	N	N	N	N	lung cancer
M	56	PLE	lung/4.1	2.5	2.1	3.3	2.8	-	N	-	-	-	lung cancer
F	45	PLE/ASE	adnexa/2.8	1.1/0.8	0.7/0.7	2.7	2.2	-	2666.6	180.5	-	-	Fibro-follicular membrane cell tumor
M	44	PLE/ASE	-	1.6/1.1	1.5/0.9	2.2	1.6	2.8/2.1	N	-	-	-	tuberculous peritonitis
F	68	PLE/ASE	adnexa/7.4	2.0/1.9	1.4/1.5	1.8	1.5	-	1892	-	-	-	ovarian cancer
F	83	PLE/ASE	liver/2.1	1.7/2.1	1.4/1.7	2.9	2.5	-	787.4	-	-	1148	liver cirrhosis
F	45	PLE/ASE	adnexa/6.8	1.1	1	2.1	1.9	-	-	-	-	-	granulosa cell tumor
M	46	PLE	lung/6.5	1.8	1.5	3.1	2.7	-	72.6	-	615.8	11.3	lung cancer
M	68	PLE	lung/11.7	1.8	1.3	2.8	2.3	-	N	N	N	N	lung cancer
M	75	PLE	lung/6.8	4.3	1.6	2.2	2	6.8/4.2	N	N	N	N	lung cancer
F	39	PLE	pleura/4.8	2.2	2	2.8	2.3	-	N	N	N	N	malignant mesothelioma
F	84	PLE	lung/25.6	2	1.6	2.6	2.1	-	N	N	-	N	lung cancer
F	39	PLE	adnexa/2.1	1.6	1.4	2.3	2	-	962	N	N	N	theca cell tumor
M	47	PLE	mediastinum/5.3	2.6	1.8	4	3.2	-	N	-	-	-	lymphoma
M	48	PLE	lung/7.3	3.3	2.9	2.8	2.6	-	N	N	N	N	lung cancer
F	47	PLE	lung/8.6	2	1.9	2.5	2.3	5.9/4.5	244	-	-	-	lung cancer
M	44	PLE	lung/0.9	1.4	1.3	2.7	2.3	-	N	N	N	N	pneumonia
F	16	PLE/ASE	mesentery/10.4	0.9	0.8	1.8	1.4	-	700	-	-	319	tuberculous peritonitis
F	47	ASE	Postoperative colon cancer/-	2.6	2.2	2.8	2.5	9.1/5.4	N	N	N	N	Peritoneal metastasis of colon cancer/+
F	48	ASE	adnexa/7.5	-	-	3.2	2.8	8.1/5.0	76.5	-	-	-	ovarian cancer
M	52	PLE/ASE	LNs	3.2/1.8	2.6/1.5	2.4	2.2	-	1069.5	2043	1022	3832	lymphoma/+
M	71	ASE	bile duct/8.8	2.1	1.7	2.4	2.2	7.9/4.6	107.3	1023	-	-	cancer/+
F	66	ASE	adnexa/19.1	2.3	1.7	1.5	1.3	13.7/8.6	1869.7	-	-	-	ovarian cancer
M	47	ASE	stomach /10.2	2.2	2	3.1	2.6	11.5/5.3	653.74	-	17.2	-	stomach cancer
F	54	PLE/ASE	adnexa/-	2.2/2.8	1.6/2.0	2.5	2.1	3.2/ 1.9；16.4/8.5	1147.5	-	-	-	ovarian cancer
F	68	ASE	adnexa/10.7	1.8	1.6	2.2	1.8	8.2/5.3	1959.9	-	-	-	ovarian cancer
F	54	ASE	adnexa	3.1	2.5	2.6	2.3	4.7/3.1	787	-	-	-	ovarian cancer
F	64	ASE	adnexa	5.2	3.1	2.3	2	-	393	-	-	-	ovarian cancer/+
F	77	PLE/ASE	adnexa	4.5/1.3	3.3/1.1	2	1.6	-	-	-	-	-	ovarian cancer/+
M	52	ASE	gall bladder/6.6	4.5	2.7	2.7	2.2	-	-	>1923	7.8	617	gallbladder carcinoma/+
M	44	ASE	peritoneum/7.1	7.3	4	0.9	0.6	-	1345	-	-	-	mesothelioma/+
F	71	ASE	pancreas/8.8	2.8	2	2.7	2.2	7.7(4.3)	485.6	936	-	329.6	pancreatic cancer/+
F	52	ASE	adnexa/17.2	1.9	1.7	2.4	2	23.5/13.3	5185.7	-	-	-	ovarian cancer
F	66	ASE	pancreas/6.0	3.1	2.2	1.9	1.6	5.7/4.0	N	N	-	N	pancreatic cancer/+
M	41	ASE	liver/3.6	1	0.9	2.6	2.2	-	-	-	34.3	-	liver cirrhosis
F	57	PLE/ASE	adnexa/7.6	1.6/2.2	1.4/1.6	2.3	2.1	5.8/4.3	126.7	435.8	-	-	ovarian cancer
F	50	ASE	adnexa/14.6	2.4	1.7	2.8	2.5	14.1/7.6	277.1	38.5	-	-	ovarian cancer
F	43	PLE/ASE	adnexa/10.9	3.0/2.4	2.1/1.8	2.4	1.9	6.2/4.4	4361.2	-	-	-	ovarian cancer
F	48	PLE/ASE	LNs/4.6	1.4/1.5	1.3/1.3	2.2	1.9	-	N	N	N	N	castleman
F	62	PLE/ASE	LNs/16.3	1.1	0.9	1.2	0.9	-	N	-	-	-	B lymphoma
M	57	PLE/ASE	stomach /14.8	1.6/3.2	1.4/2.0	1.8	1.4	-	321.6	-	-	-	B lymphoma
F	57	ASE	-	1.6	1.1	2.5	2.3	-	530.5	493.4	-	654.4	liver cirrhosis
F	51	ASE	adnexa/13.8	2	1.7	1.9	1.7	4.6/2.9	2116.4	-	-	-	ovarian cancer
F	79	ASE	liver	1.9	1.6	3.1	2.4	-	897.2	N	N	N	liver cirrhosis
F	63	ASE	LNS/27.3	1.7	1.5	1.8	1.4	-	N	N	N	N	lymphoma
M	82	PLE/ASE	-	1.4/1.1	1.2/0.9	2.7	2.2	-	36.6	34.5	-	-	liver cirrhosis
F	55	PLE/ASE	adnexa	3/2.1	2.1/1.7	3.9	3.2	8.4/4.6	2240.7	-	-	323.9	ovarian cancer
F	52	PLE/ASE	adnexa/15.4	2.1/2.0	1.8/1.7	2.4	2.1	7.8/4.5	1012	-	-	-	ovarian cancer
F	45	PLE/ASE	adnexa/2.8	1.1/0.8	0.7/0.7	2.7	2.2	-	2666.6	180.5	-	-	Fibro-follicular membrane cell tumor
M	44	PLE/ASE	-	1.6/1.1	1.5/0.9	2.2	1.6	2.8/2.1	N	-	-	-	Tuberculous peritonitis
F	47	ASE	adnexa/16.1	2.4	2	2.5	2.1	6.9/3.6	5160	30.4	-	-	ovarian cancer
F	45	ASE	adnexa/10.3	2.3	1.7	1.6	1.3	4.2/2.2	3720	-	-	545.2	ovarian cancer
F	68	PLE/ASE	adnexa/7.4	2.0/1.9	1.4/1.5	1.8	1.5	-	1892	-	-	-	ovarian cancer
F	83	PLE/ASE	Liver/-	1.7/2.1	1.4/1.7	2.9	2.5	-	787.4	-	-	1148	liver cirrhosis
F	45	PLE/ASE	adnexa/6.8	1.1	1	2.1	1.9	-	-	-	-	-	Adult granulosa cell tumor
F	46	ASE	adnexa/2.6	2.1/2.0	1.7	2.7	2.3	-	-	-	-	-	Adult granulosa cell tumor
F	46	ASE	liver/8.7	1.4	1.2	2.4	2.3	-	1870	-	-	-	B lymphoma
F	67	ASE	adnexa/5.0	2.3	2	2.3	1.9	-	1691	27	-	-	ovarian cancer
F	45	ASE	adnexa/3.8	1.9	1.7	2.4	1.9	-	607	-	-	-	ovarian cancer
F	74	ASE	intestines/4.3	2.8	2	2.9	2.6	3.7/2.9	178.1	-	-	-	Adenocarcinoma of intestine
F	49	ASE	adnexa/15.1	2	1.7	2.7	2.5	7.0/5.5	2359	-	-	-	ovarian cancer
F	52	ASE	adnexa/35.8	1.5	1.4	2.1	1.7	-	1060	45	-	-	ovarian cancer
F	69	ASE	-	2.1	1.8	2.4	2.1	-	N	N	N	N	liver cirrhosis
F	57	ASE	adnexa/14.9	2.7	2.3	2.6	2.1	-	1364	-	-	514	ovarian cancer
F	63	ASE	adnexa/10.6	2.3	1.7	2.5	2.2	5.4/3.1	1038	28	-	-	ovarian cancer
F	16	PLE/ASE	mesentery/10.4	0.9	0.8	1.8	1.4	-	700	-	-	319	Tuberculous peritonitis
F	68	ASE	adnexa/16.9	2.5	2	2.7	2.3	11.8/7.2	718	-	-	-	ovarian cancer
F	61	ASE	stomaca/14.1	2.9	2.6	2.2	1.9	3.8/2.5	134	-	-	-	stomach cancer
F	72	ASE	adnexa/11.6	2.6	1.3	2.7	2.1		585.2	-	-	-	ovarian cancer/+
M+B2B272:B279	44	PLE/ASE	lung/4.3	1.1/1.2	1.0/1.0	1.6	1.4	8.1/5.5	657.4	-	-	485	Tuberculous peritonitis/-
